# Supplementary material for: Atomic Analysis of Protein-Protein Interfaces with Known Inhibitors: The 2P2I Database
Source: PubMed Central journal article supplement (PMC2834754; doi:10.1371/journal.pone.0009598), 2010-03-09

**Supplementary Material Figure S1**

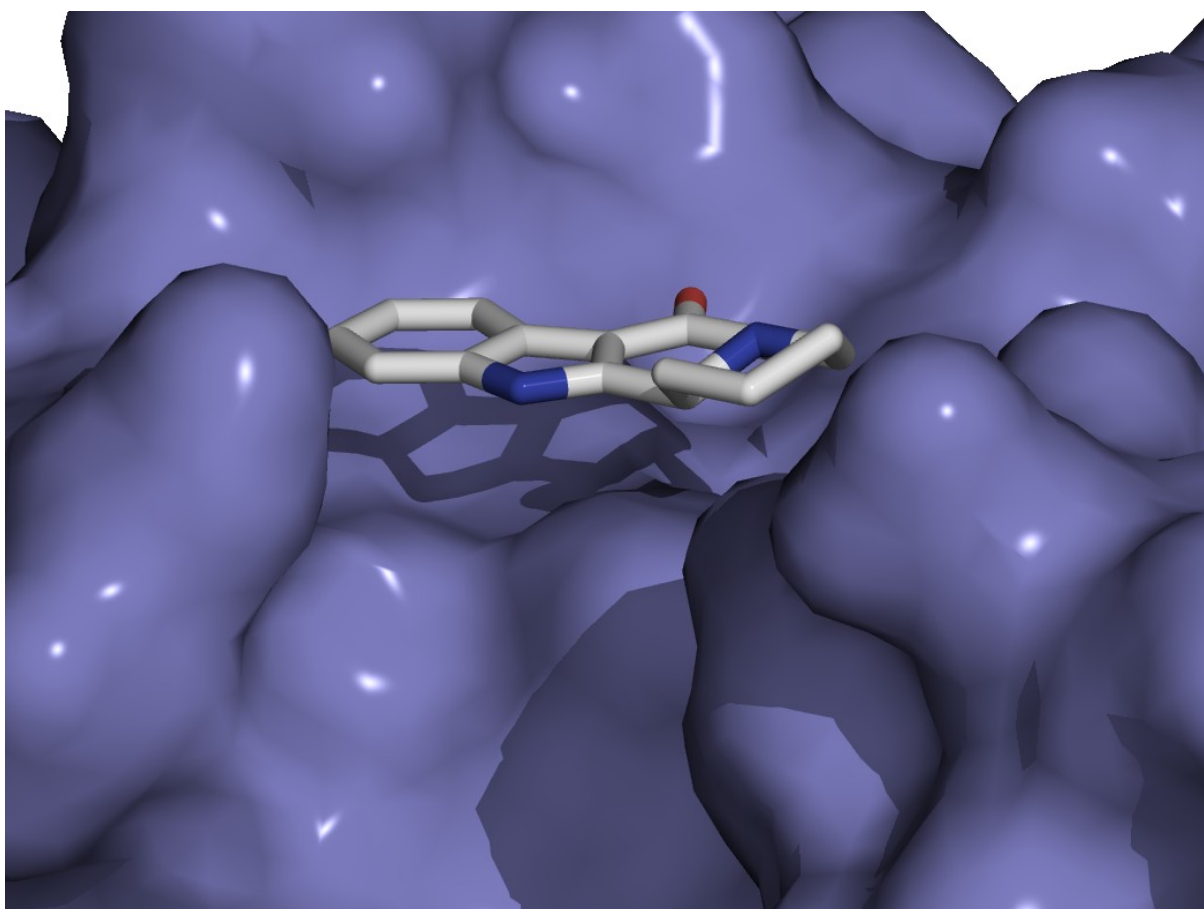

Supplement: pone.0009598.s001.pdf [file pone.0009598.s001.pdf]
