# Supplementary material for: Atomic Analysis of Protein-Protein Interfaces with Known Inhibitors: The 2P2I Database
Source: PubMed Central journal article supplement (PMC2834754; doi:10.1371/journal.pone.0009598), 2010-03-09

## Supplementary Material Figure S2

Number of complexes versus Number of Hydrogen bonds/ $100\text{\AA}^2$  ( $\pm 0.1$ )

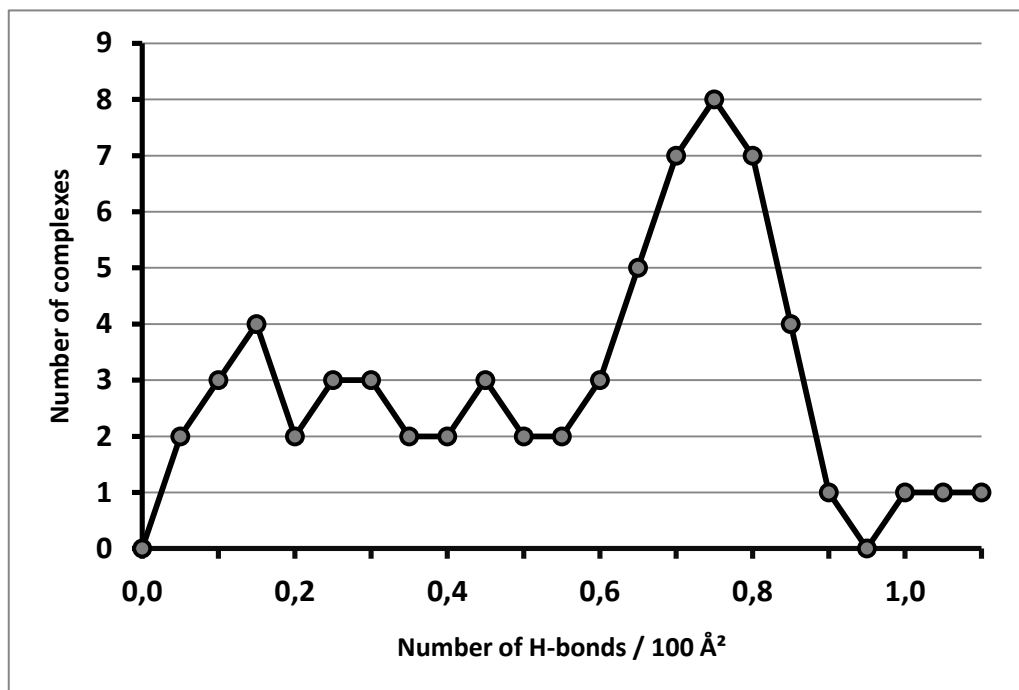

Supplement: pone.0009598.s002.pdf [file pone.0009598.s002.pdf]
