# Supplementary material for: Atomic Analysis of Protein-Protein Interfaces with Known Inhibitors: The 2P2I Database
Source: PubMed Central journal article supplement (PMC2834754; doi:10.1371/journal.pone.0009598), 2010-03-09
Supplement: pone.0009598.s003.pdf [file pone.0009598.s003.pdf]

## Supplementary Material Figure S3

Query used to parse the RCSB PDB

| Has Ligand(s) |     |
|---------------|-----|
| Has Ligands   | Yes |

| Macromolecular Type |     |
|---------------------|-----|
| Contains Protein    | Yes |
| Contains DNA        | No  |
| Contains RNA        | No  |
| Contains            | No  |

| Structure Title |           |
|-----------------|-----------|
| Contains        | inhibitor |

| Structure Title |   |
|-----------------|---|
| Contains        | * |

\* Protein name (ex: trypsin)
