# Supplementary material for: Atomic Analysis of Protein-Protein Interfaces with Known Inhibitors: The 2P2I Database
Source: PubMed Central journal article supplement (PMC2834754; doi:10.1371/journal.pone.0009598), 2010-03-09
Supplement: pone.0009598.s004.pdf [file pone.0009598.s004.pdf]

## Supplementary Information Table S1

Root Mean Square Deviations. When several structures are compared the average rms is shown.

| FREE vs Protein/Protein Complex |      |         |      |          |
|---------------------------------|------|---------|------|----------|
| Free                            | ChID | Complex | CHID | rms (CA) |
| 1f46                            | A    | 1f47    | B    | 0,90     |
| 1z1m                            | A    | 1ycq    | A    | 1,80     |
| 1z1m                            | A    | 1ycr    | A    | 1,90     |
| 1r2d                            | A    | 1bxl    | A    | 2,3      |
| 1f9x                            | A    | 1g73    | C    | 2,30     |
| 1f9x                            | A    | 1nw9    | A    | 2,40     |

| FREE vs Protein/Inhibitor Complex |      |                                     |            |          |
|-----------------------------------|------|-------------------------------------|------------|----------|
| Free                              | ChID | Protein/Inhibitor                   | CHID       | rms (CA) |
| 1f46                              | A    | 1s1j,1s1s,1y2f,1y2g                 | A (1s1s:B) | 0,70     |
| 1z1m                              | A    | 1rv1,1t4e                           | A          | 2,05     |
| 1r2d                              | A    | 1ysg,1ysi,1ysn,2o1y,2o2m, 2o2n,2yxj | A          | 1,79     |
| 1f9x                              | A    | 2jk7,2opy,3clx,3cm7,3cm2,3eyl       | A          | 2,62     |
| 1f9x                              | A    | 1tfq,1tft                           | A          | 2,40     |

| Protein/Protein vs Protein/Inhibitor Complexes |      |                                     |            |          |
|------------------------------------------------|------|-------------------------------------|------------|----------|
| Complex                                        | CHID | Protein/Inhibitor                   | CHID       | rms (CA) |
| 1F47                                           | B    | 1s1j,1s1s,1y2f,1y2g                 | A (1s1s:B) | 0,85     |
| 1YCQ                                           | A    | 1ttv                                | A          | 1,10     |
| 1YCR                                           | A    | 1rv1,1t4e                           | A          | 0,95     |
| 1BXL                                           | A    | 1ysg,1ysi,1ysn,2o1y,2o2m, 2o2n,2yxj | A          | 2,93     |
| 1G73                                           | C    | 2jk7,2opy,3clx,3cm7,3cm2,3eyl       | A          | 0,52     |
| 1NW9                                           | A    | 1tfq,1tft                           | A          | 2,10     |

|      |   |      |   |      |
|------|---|------|---|------|
| 1scn | E | 1cse | E | 0,30 |
| 1scn | E | 1r0r | E | 0,30 |
| 1sup | A | 1to2 | E | 0,30 |
| 1hj9 | A | 2uuy | A | 0,70 |
| 2zff | H | 3b9f | H | 0,60 |
| 1r6k | A | 1tue | B | 1,40 |
| 2cio | A | 3e1z | B | 0,40 |
| 1m47 | A | 1z92 | A | 1,30 |
| na   |   | 1oo9 | A |      |
| 2ppn | A | 1b6c | A | 0,50 |
| na   |   | 2j0t | A |      |

|      |   |      |   |      |
|------|---|------|---|------|
| 1scn | E | 1bh6 | A | 0,40 |
| 1scn | E | 1bh6 | A | 0,40 |
| 1sup | A | 1bh6 | A | 0,50 |
| 1hj9 | A | 2fs8 | A | 1,60 |
| 2zff | H | 1jwt | A | 0,40 |
| 1r6k | A | 1r6n | A | 0,90 |
| 2cio | A | 1cvz | A | 0,30 |
| 1m47 | A | 1m48 | A | 0,60 |
| na   |   | 1usn | A |      |
| 2ppn |   | 1j4r | A |      |
| na   |   | 966c | A |      |

|      |   |      |   |      |
|------|---|------|---|------|
| 1cse | E | 1bh6 | A | 0,40 |
| 1r0r | E | 1bh6 | A | 0,40 |
| 1to2 | E | 1bh6 | A | 0,50 |
| 2uuy | A | 2fs8 | A | 1,50 |
| 3b9f | H | 1jwt | A | 0,90 |
| 1tue | B | 1r6n | A | 1,50 |
| 3e1z | B | 1cvz | A | 0,40 |
| 1z92 | A | 1m48 | A | 1,40 |
| 1oo9 | A | 1usn | A | 1,20 |
| 1b6c | A | 1j4r | A | 0,61 |
| 2j0t | A | 966c | A | 0,50 |

|          |       |         |
|----------|-------|---------|
| Class I  | Mean  | 1,86    |
|          | Stdev | 0,59414 |
| Class II | Mean  | 0,64    |
|          | Stdev | 0,42459 |
| ALL      | Mean  | 1,08    |
|          | Stdev | 0,76478 |

|          |       |         |
|----------|-------|---------|
| Class I  | Mean  | 1,91    |
|          | Stdev | 0,7481  |
| Class II | Mean  | 0,64    |
|          | Stdev | 0,43074 |
| ALL      | Mean  | 1,13    |
|          | Stdev | 0,84278 |

|          |       |         |
|----------|-------|---------|
| Class I  | Mean  | 1,41    |
|          | Stdev | 0,91668 |
| Class II | Mean  | 0,85    |
|          | Stdev | 0,46717 |
| ALL      | Mean  | 1,04    |
|          | Stdev | 0,6895  |
