# Supplementary material for: Atomic Analysis of Protein-Protein Interfaces with Known Inhibitors: The 2P2I Database
Source: PubMed Central journal article supplement (PMC2834754; doi:10.1371/journal.pone.0009598), 2010-03-09
Supplement: pone.0009598.s006.pdf [file pone.0009598.s006.pdf]

### Supplementary Information Table S3

#### Geometrical parameters for the subset of the interface (4.5 Å around inhibitor)

|                     |       | planarity | eccentricity | GV_Index | H-bonds | HB/100Å <sup>2</sup> | Salt-bridges | # Segments | % charged resid |
|---------------------|-------|-----------|--------------|----------|---------|----------------------|--------------|------------|-----------------|
| Zip1/FtsZ           | 1f47* | 2,686     | 0,731        | 0,76     | 0       | 0                    | 0            | 3          | 22,22           |
| BclXL/Bak           | 1bxl* | 3,685     | 0,719        | 1,65     | 1       | 0,12                 | 0            | 5          | 23,08           |
| MDM2/p53            | 1ycr* | 2,308     | 0,745        | 1        | 1       | 0,13                 | 0            | 2          | 20,00           |
| MDM2/p53            | 1ycq* | 2,138     | 0,623        | 0,54     | 2       | 0,30                 | 0            | 3          | 0,00            |
| XIAP BIR3/SMAC      | 1g73* | 2,235     | 0,721        | 0,71     | 7       | 0,99                 | 0            | 2          | 42,86           |
| XIAP BIR3/CASPASE 9 | 1nw9* | 2,3       | 0,631        | 1,57     | 5       | 0,08                 | 0            | 3          | 0,00            |
| Class I             | mean  | 2,56      | 0,70         | 1,04     | 2,67    | 0,39                 | 0            | 3,00       | 18,03           |
|                     | stdev | 0,58      | 0,05         | 0,47     | 2,73    |                      | 0            | 1,10       | 16,21           |
| Subtilisin/Eglin C  | 1cse* | 2,02      | 0,70         | 1,45     | 8       | 0,86                 | 0            | 6          | 0,00            |
| Subtilisin/Eglin C  | 1r0r* | 2,13      | 0,69         | 1,76     | 10      | 1,07                 | 0            | 6          | 0,00            |
| Subtilisin/Eglin C  | 1to2* | 2,47      | 0,70         | 1,15     | 10      | 1,01                 | 0            | 8          | 0,00            |
| Trypsin/trypsin inh | 2uuy* | 2,14      | 0,81         | 2,34     | 9       | 1,00                 | 1            | 7          | 10,00           |
| Thrombin/ProtC_inh  | 3b9f* | 2,70      | 0,69         | 1,27     | 5       | 0,63                 | 1            | 7          | 21,05           |
| HPV E2/HPV E1       | 1tue* | 1,74      | 0,73         | 4,42     | 7       | 1,17                 | 0            | 8          | 27,27           |
| Chagasin/papain     | 3e1z* | 1,97      | 0,93         | 1,53     | 6       | 0,64                 | 0            | 8          | 18,75           |
| FKBP12/TGFR         | 1b6c* | 2,74      | 0,62         | 1,83     | 0       | 0,00                 | 0            | 8          | 21,43           |
| MMP1/TIMP1          | 2j0t* | 2,47      | 0,35         | 2,75     | 10      | 1,41                 | 0            | 6          | 13,33           |
| MMP3/TIMP1          | 1oo9* | 2,35      | 0,70         | 1,43     | 1       | 0,13                 | 0            | 7          | 36,37           |
| IL-2/IL-2R          | 1z92* | 1,37      | 0,84         | 1,29     | 3       | 0,36                 | 2            | 6          | 8,33            |
| Class II            | mean  | 2,19      | 0,70         | 1,93     | 6,27    | 0,74                 | 0,36         | 7,00       | 14,23           |
|                     | stdev | 0,41      | 0,15         | 0,96     | 3,64    |                      | 0,67         | 0,89       | 12,00           |
| ALL                 | mean  | 2,32      | 0,70         | 1,61     | 5,00    | 0,63                 | 0,24         | 5,59       | 15,57           |
|                     | stdev | 0,49      | 0,12         | 0,91     | 3,71    |                      | 0,56         | 2,18       | 13,25           |

## Accessible Surface Area for the subset of the interface (4.5 Å around inhibitor)

### INTERFACE

|                     |       | ASA    |
|---------------------|-------|--------|
| ZipA/FtsZ           | 1f47* | 1119,3 |
| BclXL/Bak           | 1bxl* | 1614,1 |
| MDM2/p53            | 1ycr* | 1173,9 |
| MDM2/p53            | 1ycq* | 1020,2 |
| XIAP BIR3/SMAC      | 1g73* | 679,8  |
| XIAP BIR3/CASPASE 9 | 1nw9* | 754,8  |

|         |        |
|---------|--------|
| Class I | 1060,3 |
|         | 335,5  |

|                     |       |        |
|---------------------|-------|--------|
| Subtilisin/Eglin C  | 1cse* | 1064,3 |
| Subtilisin/Eglin C  | 1r0r* | 1040,3 |
| Subtilisin/Eglin C  | 1to2* | 1130,5 |
| Trypsin/trypsin inh | 2uuy* | 969,6  |
| Thrombin/ProtC_inh  | 3b9f* | 1103,8 |
| HPV E2/HPV E1       | 1tue* | 595,8  |
| Chagasin/papain     | 3e1z* | 1129,1 |
| FKBP12/TGFR         | 1b6c* | 1286,6 |
| MMP1/TIMP1          | 2j0t* | 1040,4 |
| MMP3/TIMP1          | 1oo9* | 1121,2 |
| IL-2/IL-2R          | 1z92* | 1344,5 |

|          |        |
|----------|--------|
| Class II | 1075,1 |
|          | 192,3  |

|     |        |
|-----|--------|
| ALL | 1069,9 |
|     | 241,5  |

### SEPARATED INTERFACES

| Target | Partner |
|--------|---------|
| 526,3  | 593,0   |
| 766,4  | 847,7   |
| 529,8  | 644,1   |
| 461,3  | 558,9   |
| 288,9  | 390,9   |
| 313,8  | 441,1   |

|       |       |
|-------|-------|
| 481,1 | 579,3 |
| 173,9 | 162,1 |

|       |       |
|-------|-------|
| 474,1 | 590,2 |
| 466,9 | 573,4 |
| 514,9 | 615,5 |
| 415,8 | 553,8 |
| 503,3 | 600,5 |
| 289,6 | 306,1 |
| 606,5 | 522,7 |
| 631,7 | 654,9 |
| 473,3 | 567,1 |
| 567,5 | 553,7 |
| 676,7 | 667,7 |

|       |       |
|-------|-------|
| 510,9 | 564,1 |
| 108,3 | 96,0  |

|       |       |
|-------|-------|
| 500,4 | 569,5 |
| 130,3 | 118,5 |
